# A comprehensive evaluation of polygenic score methods across cohorts in psychiatric disorders

Authors:

Guiyan Ni,<sup>1</sup> Jian Zeng,<sup>1</sup> Joana A Revez,<sup>1</sup> Ying Wang,<sup>1</sup> Tian Ge,<sup>2</sup> Restaudi Restaudi,<sup>1</sup>

Jacqueline Kiewa,<sup>1</sup> Dale R Nyholt,<sup>3</sup> Jonathan R I Coleman,<sup>4</sup> Jordan W Smoller,<sup>5,2,6</sup>

Schizophrenia Working Group of the Psychiatric Genomics Consortium,<sup>7</sup>

Major Depressive Disorder Working Group of the Psychiatric Genomics Consortium,<sup>8</sup>

Jian Yang,<sup>1</sup> Peter M Visscher,<sup>1</sup> Naomi R Wray<sup>1,9</sup>

1. Institute for Molecular Bioscience, University of Queensland, Brisbane, Queensland, 4072, Australia

2. Psychiatric and Neurodevelopmental Genetics Unit (PNGU), Massachusetts General Hospital, Boston, MA, 02114, US

3. Faculty of Health, School of Biomedical Sciences, Centre for Genomics and Personalised Health, Queensland University of Technology, Brisbane, Queensland, 4000, Australia

4. Social, Genetic, and Developmental Psychiatry Centre, Institute of Psychiatry, Psychology, and Neuroscience, King's College London, London, SE58AF United Kingdom

5. Department of Psychiatry, Massachusetts General Hospital, Boston, MA, 02114, US

6. Stanley Center for Psychiatric Research, Broad Institute, Cambridge, MA, 02142, US

7. A list of members and affiliations appears in the Supplementary Data.

8. A list of members and affiliations appears in the Supplementary Data.

9. Queensland Brain Institute, The University of Queensland, Brisbane, Queensland, 4072, Australia

**NOTE: This preprint reports new research that has not been certified by peer review and should not be used to guide clinical practice.**

25 Correspondence:

26 \*Naomi R Wray: [naomi.wray@uq.edu.au](mailto:naomi.wray@uq.edu.au)

27 **Abstract:**

28 Polygenic scores (PGSs), which assess the genetic risk of individuals for a disease, are  
29 calculated as a weighted count of risk alleles identified in genome-wide association studies  
30 (GWASs). PGS methods differ in terms of which DNA variants are included in the score and  
31 the weights assigned to them. PGSs are evaluated in independent target samples of  
32 individuals with known disease status. Evaluation of new PGS methods are made using  
33 simulated data or single target cohort, however, in real data sets there can be heterogeneity  
34 between target sample cohorts, which could reflect a number of real or artefactual factors.  
35 The Psychiatric Genomics Consortium working groups for schizophrenia (SCZ) and major  
36 depressive disorder (MDD) bring together many independently collected case-control cohorts  
37 for GWAS meta-analysis. These resources are used here in repeated application of leave-one-  
38 cohort-out GWAS analyses, generating robust conclusions for PGS prediction applied across  
39 multiple target (left-out) cohorts. Eight PGS methods (P+T, SBLUP, LDpred-Inf, LDpred-  
40 funct, LDpred, PRS-CS, PRS-CS-auto, SBayesR) are compared. We found that SBayesR had  
41 the highest prediction evaluation statistics in most comparisons. For SCZ across 30 target  
42 cohorts, the SBayesR PGS achieved a mean area under the receiver operator characteristic  
43 curve (AUC) of 0.733, and explained 9.9% of variance on the liability scale. For MDD across  
44 26 target cohorts, the AUC and variance explained were 0.601 and 4.0%, respectively. The  
45 variance explained by the SBayesR PGS was 46% and 43% higher for SCZ and MDD,  
46 respectively, compared to the basic p-value thresholding P+T method.

47

## 48 Introduction

49

50 Polygenic scores (PGSs), which assess the genetic risk of individuals for a disease<sup>1,2</sup>, are  
51 calculated as a weighted count of genetic risk alleles in the genome of an individual, with the  
52 risk alleles and their weights typically derived from the results of genome-wide association  
53 studies (GWAS).<sup>3</sup> PGS can be calculated for any trait or disease with sufficiently powered  
54 GWAS ('discovery samples'). For many common complex genetic disorders, such as  
55 cancers<sup>4,5</sup> and heart disease<sup>6,7</sup>, there is increasing interest in trialling PGS for early disease  
56 detection, prevention and intervention<sup>8,9</sup>. In the context of psychiatric disorders, it has been  
57 argued<sup>10</sup> that PGS may have utility in the context of youth mental health clinics, where young  
58 people present with symptoms that have not yet crystallised to portray a clear treatment  
59 pathway. A high PGS could nudge clinic decision making for those presenting in this  
60 prodromal state.

61

62 There are now many methods to calculate PGSs, and the methods differ in terms of two key  
63 criteria: which DNA variants to include (DNA variants here are limited to single nucleotide  
64 polymorphisms, SNPs, but can include other DNA variants tested for association with a trait)  
65 and what weights to allocate to them. While stringent thresholds are set to declare  
66 significance for association of individual SNPs in GWAS, PGSs are robust to inclusion of  
67 some false positives, and the maximum prediction from PGSs tested in target samples (i.e.,  
68 GWAS samples independent of the GWAS discovery sample) may include nominally  
69 associated SNPs. The optimum method to decide which SNPs to select and what weights to  
70 allocate them, may differ between traits depending on the sample size of the discovery  
71 GWAS and on the genetic architecture of the trait (the number, frequencies and effect sizes  
72 of causal variants), particularly given the linkage disequilibrium (LD) structure between

73 SNPs. Often, when new PGS methods are introduced, comparisons are made between a  
74 limited set of methods using simulated data, together with application to some real data  
75 examples. However, it can be difficult to compare across the new methods, particularly  
76 because in real data there can be heterogeneity in PGS evaluation statistics between target  
77 samples, not encountered in idealised simulations. The reasons for this heterogeneity are  
78 usually unknown but could reflect a number of factors such as phenotype definition,  
79 ascertainment strategies of cases and controls, cohort-specific ancestry within the broad  
80 classification of ancestry defined by the GWAS discovery samples (e.g., European), or  
81 technical artefacts in genotype generation.

82

83 Here, we compare eight PGS methods (P+T<sup>3; 11</sup>, SBLUP<sup>12</sup>, LDpred-Inf<sup>13</sup>, LDpred<sup>13</sup>, LDpred-  
84 funct<sup>14</sup>, PRS-CS<sup>15</sup>, PRS-CS-auto<sup>15</sup> and SBayesR<sup>16</sup> in **Table 1** ). Some of these methods (P+T,  
85 LDpred and PRS-CS) require a tuning sample, a GWAS cohort with known trait status that is  
86 independent of both discovery and target samples, used to select parameters needed to  
87 generate the PGSs in the target sample. Briefly, P+T (pruning with a p-value threshold) uses  
88 the GWAS effect size estimates as SNP weights and includes independent SNPs (defined by  
89 an LD  $r^2$  filter for a given chromosomal window distance) with association p-values lower  
90 than a threshold (chosen after application in a tuning sample). P+T is the most commonly  
91 used and basic method, and so is the bench-mark method here. The other methods (referred to  
92 here as recent methods) assume either that all SNPs have an effect size drawn from a normal  
93 distribution (SBLUP and LDpred-Inf) or that SNP effects are drawn from mixtures of  
94 distributions with the key parameters defining these architectures estimated through Bayesian  
95 frameworks (LDpred, PRS-CS, SBayesR). LDpred-funct includes functional annotation to  
96 SNPs to up/down weight their contributions to the PGSs, which could improve prediction  
97 accuracy if this functional information helps to better separate true and false positive

98 associations<sup>17</sup>. We apply these methods to data from the Psychiatric Genomics Consortium  
99 (PGC) working groups for schizophrenia (SCZ)<sup>18; 19</sup> and major depressive disorder (MDD)<sup>20-</sup>  
100 <sup>22</sup> (**Tables S1 and S2**). The PGC provides a useful resource for undertaking this study  
101 because it brings together many independently collected cohorts for GWAS meta-analysis.  
102 This allows the application of repeated leave-one-cohort-out GWAS analyses generating  
103 robust conclusions from evaluation of PGS applied across multiple left-out target cohorts.

## 104 **Materials and Methods**

105 Data:

106 Schizophrenia GWAS summary statistics, denoted as PGC-SCZ2+, were available from PGC  
107 Schizophrenia (SCZ) Working group (34 European ancestry cohorts, denoted as SCZ34)<sup>18</sup>  
108 and another three cohorts from Pardiñas et al<sup>19</sup>. PGC-SCZ2+ comprises more than 8M  
109 imputed SNPs in 31K SCZ cases and 41K controls. Individual level genotype data were  
110 available from 25K cases and 30K controls of SCZ34. Detailed information about the cohorts  
111 is provided elsewhere<sup>23</sup> but is summarised in **Table S1**. Since some methods require a tuning  
112 sample (defined below), we arbitrarily chose the lie2 cohort (137 cases and 269 controls) as  
113 the tuning cohort. The GWAS discovery sample was a meta-analysis of 35 cohorts; lie2 was  
114 always excluded and then each of the remaining 33 cohorts was left-out in turn and used as  
115 the target sample. In sensitivity analyses, investigating the impact of the tuning sample, the  
116 msaf, gras and swe6 cohort were exchanged with lie2 in turn, in which msaf has a similar  
117 sample size as lie2, 327 cases and 139 controls, while gras and swe6 are larger with more  
118 than 2000 individuals each.

119

120 Major depression GWAS summary statistics were available from seven studies including UK  
121 Biobank<sup>21; 24</sup>, 23andMe<sup>25</sup>, GERA<sup>26</sup>, iPSYCH<sup>27</sup>, deCODE<sup>28</sup>, GenScotland<sup>29; 30</sup>, and the PGC

122 Major Depressive Disorder (MDD) Working group (with the data previously denoted as  
123 PGC29, but here MDD29)<sup>20</sup>. All are European ancestry studies and comprise almost 13M  
124 imputed SNPs from 248K cases and 563K controls. MDD29 includes the GWAS results from  
125 29 research study cohorts. Detailed information of the MDD29 cohorts is described  
126 elsewhere<sup>20; 21; 25-30</sup> but is summarised in **Table S2**. Individual level genotype data were  
127 available for 15K cases and 24K controls from 26 cohorts. We left one cohort out of those 26  
128 cohorts in turn as the target sample. A cohort from Muenster<sup>20</sup>, not included in the MDD29  
129 was used as the tuning sample (845 clinical defined MDD cases and 834 controls). We then  
130 meta-analysed with the other GWAS summary statistics results to make the discovery  
131 samples. We note that the discovery sample meta-analyses include samples where the  
132 depression phenotype is self-reported rather than following a structured clinical interview,  
133 nonetheless we refer to the prediction as MDD since the PGC target cohorts are of MDD  
134 cases and controls. 959 overlapped individuals between UK Biobank and MDD29 were  
135 excluded from the target cohorts.

136

137 The datasets stored in the PGC central server follow strict guidelines with local ethics  
138 committee approval.

139

140 Baseline SNP selection

141 For baseline analyses, only SNPs with minor allele frequency (MAF) > 0.1 and imputation

142 INFO score > 0.9 (converted to best-guess genotype values of 0, 1 or 2) were selected.

143 Sensitivity analyses relaxed the MAF threshold to MAF > 0.05 or 0.01 and INFO score

144 threshold to 0.3. All methods were conducted using HapMap3 SNPs, except the method P+T,

145 which was conducted based on all imputed SNPs (8M in SCZ, and 13M in MDD).

146

## 147 Prediction methods

148 We define a PGS of an individual,  $j$ , as a weighted sum of SNP allele counts:  $\sum_{i=1}^m \hat{b}_i x_{ij}$ ,  
149 where  $m$  is the number of SNPs included in the predictor,  $\hat{b}_i$  is the per allele weight for the  
150 SNP,  $x_{ij}$  is a count of the number (0, 1, or 2) of trait-associated alleles of SNP  $i$  in individual  
151  $j$ . The cohort (target sample) for which PGSs are calculated is excluded from the meta-  
152 analysis that generates the GWAS summary statistics (discovery sample), so that discovery  
153 and target samples are independent. We compared eight risk prediction methods (detailed  
154 below): The methods differ in terms of the SNPs selected for inclusion in the predictor and  
155 the  $\hat{b}_i$  values assigned to the SNPs. All methods use the GWAS summary statistics as the  
156 starting point, but each makes choices differently for which SNPs to include and for the  $\hat{b}_i$   
157 values to assign. Briefly, the key differences between the methods are the assumptions made  
158 about the underlying genetic architecture and the distributions of true effect sizes, with  
159 Bayesian methods setting some priors for these distributions. Several methods employ an LD  
160 reference sample to determine LD between SNPs. Here, we use EUR of the 1000 Genomes  
161 Project as the LD reference, unless the method software provides an LD reference. In some  
162 methods the PGS calculated in a target cohort requires estimates of parameter values, which  
163 need to be estimated by application of the PGS method to a tuning cohort (also not included  
164 in the discovery GWAS sample) using a range of parameter estimates, then selecting the  
165 parameter estimates that maximizes prediction in that tuning cohort. In all methods, once the  
166 SNPs and  $\hat{b}_i$  have been decided, PLINK `--score` is used to calculate the PGS in the target  
167 sample.

168

169 LD pruning and thresholding (P+T)<sup>3</sup>

170 In the P+T method GWAS summary statistics are pruned to be approximately independent  
171 using a LD threshold,  $r^2$ . From this quasi-independent genome-wide SNP list, SNPs are

172 selected by thresholding on a pre-specified association p-value,  $P_t$ . We evaluated P+T as  
173 implemented in Ricopili<sup>31</sup> which uses PLINK<sup>32</sup> to prune the SNP set using  $r^2 = 0.1$  within  
174 500 kb windows, and  $P_t \in (5e-08, 1e-06, 1e-04, 1e-03, 0.01, 0.05, 0.1, 0.2, 0.5, 1)$ , where  $P_t = 1$   
175 means that all SNPs from the LD-pruned list are included. In applications of P+T it is  
176 common for results from the most associated  $P_t$  to be reported (including the application in  
177 the software PRSice<sup>33</sup> which uses a continuous  $P_t$  range), but this approach utilises  
178 information from the target cohort and hence introduces a form of winner's curse. Here, the  
179  $P_t$  threshold applied in target cohorts is the  $P_t$  threshold that maximised prediction in the  
180 tuning cohort.

181

182 SBLUP<sup>12</sup>

183 SBLUP is a method that re-scales the GWAS SNP effect estimates using an external LD  
184 reference panel to transform the ordinary least-squares estimates to approximate the best  
185 linear unbiased prediction (BLUP) solutions. This method assumes an infinitesimal model  
186 where SNP effects are drawn from a normal distribution. All genome-wide SNPs are used to  
187 build the PGS. Hence, for example, consider a genomic region with a single causal variant  
188 but with many SNPs in the region correlated with the causal variant and correlated with each  
189 other. In this case the effect size estimate is “smeared” across the correlated SNPs, but with  
190 the total contribution to risk expected to represent the best estimate of the signal from the  
191 underlying causal variant. This method is implemented within the software package GCTA<sup>34</sup>.

192

193 LDpred and LDpred-inf<sup>13</sup>

194 While P+T uses arbitrary LD and p-value thresholds for selection of SNPs, LDpred tries to  
195 optimise this step in a Bayesian framework. The method uses the GWAS summary statistics  
196 and LD information from the external LD reference sample to infer the posterior mean effect



197 size of each SNP, conditioning on the SNP effect estimates of other correlated SNPs. This  
198 method assumes a point-normal prior on the distribution of SNP effects such that only a  
199 fraction of SNPs with non-zero estimated effects are selected for inclusion in the PGS. The  
200 default parameter setting for the fractions of causal SNPs ( $\pi$ , but denoted  $p$  in the original  
201 paper) were used in the tuning cohort:  $\pi \in \{1$  (i.e. all SNPs), 0.3, 0.1, 0.03, 0.01, 0.003, and  
202 0.001}, with an LD radius of  $M/3000$  ( $M$  is the number of SNPs) to obtain local LD  
203 information, as suggested by the authors<sup>13</sup>. The  $\pi$  value that maximised the prediction in the  
204 tuning sample was applied in the target sample; the  $\pi$  value can differ between target cohorts  
205 even though the same tuning cohort is used, reflecting the properties of the discovery sample  
206 which may change with each left-out target sample. When  $\pi=1$  the method is called LDpred-  
207 Inf and is equivalent to SBLUP (the concordance of results was checked, **Table S7**).

208

209 LDpred-funct<sup>14</sup>

210 LDpred-funct is an extension of the LDpred-inf (SBLUP equivalent) model but leverages  
211 trait-specific functional enrichments relative to the baseline-LD model<sup>35</sup> to up/down-weight  
212 SNP effects. The functional annotations include coding, conserved, regulatory and LD-  
213 related annotation. In the baseline-LD model, the enrichment of each category is jointly  
214 calculated via stratified LD score regression<sup>36</sup>. LDpred-funct has a non-infinitesimal model  
215 version, but in pilot analyses we found LDpred-Inf performed better than LDpred and hence  
216 only considered the LDpred-funct infinitesimal model. Thus, we continued only with the  
217 infinitesimal model version.

218

219 PRS-CS and PRS-CS-auto<sup>15</sup>

220 PRS-CS is also built under a Bayesian regression framework. Unlike LDpred which assumes  
221 a point-normal distribution as a prior, which is discrete, PRS-CS assumes a continuous

222 shrinkage prior on the SNP effects. PRS-CS was implemented using the default setting and  
223 with the LD reference panel provided with the PRS-CS software, which is computed using  
224 the 1000 Genomes samples and HapMap3 SNPs. In PRS-CS, for the global scaling parameter  
225 which is applied to all SNP effects  $\phi$ , the search grid is  $\phi^{1/2} \in \{0.0001, 0.001, 0.01, 0.1, 1\}$ ,  
226 The  $\phi$  that produces the best predictive performance in a tuning data set is selected for use in  
227 the target sample. In PRS-CS-auto,  $\phi$  is automatically learnt from GWAS summary statistics  
228 and no tuning sample is needed.

229

230 SBayesR

231 SBayesR is a method that re-scales the GWAS SNP effect estimates based on Bayesian  
232 multiple regression. SBayesR assumes that the standardised SNP effects are drawn from a  
233 mixture of four zero-mean normal distributions with different variances (one of the variances  
234 is zero, with a probability of  $\pi_1$ ), indicating that only a fraction of SNPs ( $1-\pi_1$ ) have non-zero  
235 estimated effects which contribute to the phenotype. Moreover, the contributions of SNPs in  
236 different distributions differ because of different variances. Here, we evaluated SBayesR in  
237 the default setting. For the LD reference, we used the same sparse LD matrix as the one used  
238 in Lloyd-Jones et al.<sup>16</sup>, where the LD matrix was built based on the HapMap3 SNPs of  
239 randomly selected and unrelated 50K UK Biobank individuals. Whereas LDpred estimates  
240  $\pi$  from a tuning sample, SBayesR estimates  $\pi$  from the GWAS discovery sample, so no  
241 tuning sample is needed.

242

243 Evaluation of out-of-sample prediction

244 The accuracy of prediction in each target cohort was quantified by 1) Area under the receiver  
245 operator characteristic curve (AUC; R library pROC). AUC can be interpreted as a  
246 probability that a case ranks higher than a control. 2) The proportion of variance on the

247 liability scale explained by PGS<sup>37</sup>. We used the population lifetime risk of SCZ and MDD as  
248 1% and 15% respectively to convert the variance explained in a linear regression to the  
249 liability scale<sup>20; 23; 38</sup>. 3) Odds ratio (OR) of tenth PGS decile relative to the first decile. 4)  
250 Odds ratio of tenth PGS decile relative to those ranked in the middle of the PGS distribution,  
251 which is calculated as the average of OR of tenth decile relative to fifth and sixth decile. 5)  
252 Standard deviation unit increase in cases. The PGS in each target cohort were scaled by  
253 standardising the PGS of controls and applying the standardisation to cases:

254  $\frac{PGS_{case} - mean(PGS_{control})}{SD(PGS_{control})}$ , where SD is standard deviation. This does not impact PGS

255 evaluation statistics but simply means that PGS are in SD units for all cohorts. We compare  
256 the median value for evaluation statistics 3 and 4, because they are significantly different  
257 from a normal distribution based on a Shapiro-Wilk Normality Test. The regression analyses  
258 for evaluation statistics 2-4 include 6 ancestry principal components as covariates. These  
259 covariates are not included in the AUC model and the standard deviation unit increase in  
260 cases model. To illustrate the impact on results, for SCZ given the SBayesR mean variance in  
261 liability of 9.9% and lifetime risk of 0.01 the AUC expected from normal distribution  
262 theory<sup>39</sup> is 0.730, compared to the mean reported of 0.733. For MDD given the variance in  
263 liability of 4.0% and lifetime risk of 0.15 the expected AUC is 0.603 compared to the mean  
264 reported of 0.601.

265

## 266 Results

267 Prediction evaluation statistics based on recent PGS methods applied to SCZ across 30 study  
268 cohorts (**Figure 1, Table S3 and S4**), and to MDD across 26 cohorts (**Figure 2, Table S5 and**  
269 **S6**), show higher values for all methods over the benchmark method, P+T. The evaluation  
270 statistics include i) area under the receiver operator characteristic curve (AUC) which can be

271 interpreted as the probability that a case ranks higher than a control, when the case and  
272 control are randomly drawn; ii) mean difference between cases and controls expressed in  
273 PGS standard deviation (SD) units of controls, after standardization of the PGS so that  
274 controls in each target cohort have a mean of 0 and a SD of 1; iii) variance in liability  
275 explained by the PGS; iv) Odds ratio of the top 10% ranked on PGS relative to the bottom  
276 10%; v) Odds ratio of the top 10% ranked on PGS relative to those ranking in the middle of  
277 the PGS distribution; vi) difference between mean of PGS in the top 10% of cases and mean  
278 PGS in top 10% of controls.

279

280 There is variability in prediction statistics across target cohorts which is not a reflection of  
281 sample size (**Figure S1 and Table S4** for SCZ, **Figure S2 and Table S6** for MDD). To  
282 provide a benchmark in terms of power, we note that for SCZ, the mean difference in PGS  
283 between cases and controls for the P+T method is 0.73 standard deviation units of the control  
284 sample (SDU). A sample size of only 42 cases and 42 controls has 95% power to detect this  
285 difference at a nominal significance threshold of 0.05; all SCZ cohorts are bigger than this.  
286 For MDD, the mean difference in PGS SDU between cases and controls for the P+T method  
287 is 0.30, and the power calculation requires a sample size of 290 cases and 290 controls to  
288 detect this difference; 20 (77%) of the MDD cohorts achieve this effective size. Hence, the  
289 SCZ and MDD cohorts are well-powered for PGS evaluation.

290

291 The correlations of PGS between different methods are high (**Table S7**), but are lowest  
292 between P+T and other methods (minimum 0.67). In contrast, the correlations between the  
293 recent methods are always  $> 0.83$ . In theory, LDpred-Inf and SBLUP are the same method. In  
294 practice, there are differences in implementation (e.g., different input parameters associated  
295 with definition of LD window), generating a correlation 0.977. The differences in prediction

296 evaluation statistics between methods are small. For SCZ the AUC for all recent methods  
297 other than PRS-CS-auto are significantly higher than the P+T method after Bonferroni  
298 correction ( $p\text{-value} < 0.0018 = 0.05/28$  (28 pair-wise comparisons between 8 methods), two-  
299 tailed Student's t-test). For MDD none of the differences between methods were significant.  
300 For both SCZ and MDD, regardless of tuning cohorts SBayesR showed relatively better  
301 performance (on average across target cohorts) than other methods on all statistics, where  
302 other recent methods performed similarly (**Figures 1 and 2**). For variance explained on the  
303 liability scale, the P+T PGS explained a mean of 6.8% across cohorts for SCZ. For SBayesR,  
304 the mean was 9.9% for variance explained in liability, an increase of 46%. For MDD  
305 although the variance explained is lower in absolute terms, 2.8% for P+T vs 4.0% for  
306 SBayesR; the latter represents a 43% increase.

307  
308 We provide several evaluation statistics that focus on those in the top 10% of PGS, because  
309 clinical utility of PGS for psychiatric disorders is likely to focus on individuals that are in the  
310 top tail of the distribution of predicted genetic risk. The odds ratio for top vs bottom decile  
311 are large, ranging from 13.8 for P+T to 22.5 for SBayesR for SCZ and 3 to 4 for MDD.  
312 While these top vs bottom decile odds ratios (**Figure 1c and 2c**) are much larger than the  
313 odds ratio obtained by using PGS to screen a general population (**Figure 1d and 2d**) or  
314 patients in a healthcare system to identify people at high risk<sup>40; 41</sup>, these comparisons are  
315 useful for research purposes, which could for example make cost-effective experimental  
316 designs focussing on individuals with high vs low PGS.<sup>42</sup> The odds ratio of top 10% vs  
317 middle 10% are much less impressive, up to median of 5.5 for SCZ and 2 for MDD, but more  
318 fairly represents the value of PGS in population settings. These values can be benchmarked  
319 against risk in 1<sup>st</sup> degree relatives of those affected, which are of the order of 8 for SCZ and 2  
320 for MDD; low values are always expected for MDD because it is more common (lifetime risk

321 ~15% compared to ~1% for SCZ). The odds ratio values are particularly high for some  
322 cohorts (**Table S4**), because in some SCZ cohorts the bottom 10% include very few or no  
323 cases, especially in cohorts with relatively small sample sizes. Since the PGS are normally  
324 distributed, as expected the mean PGS for controls in the top 10% PGS is ~1.75 SD units  
325 ( $K=0.10$ ,  $t=qnorm(1-K)$ ,  $z=dnorm(t)$ , mean value of top 10% of a normal distribution  $=z/K$ ),  
326 whereas the top 10% of cases have mean value of 2.63 control sample SD units for SCZ  
327 cases and 2.09 control sample SD units for MDD cases, using SBayesR. These mean values  
328 of the top 10% in cases equate to expectations from the population of the top 1.1% and top  
329 4.7% for SCZ and MDD, respectively.

330

331 **The impact of tuning cohort.** Three methods (i.e., P+T, LDpred and PRC-CS) use tuning  
332 cohorts to determine key parameters for application of the method into the target cohorts.  
333 Tuning parameters impact results in two ways. First, the parameters may be dependent on the  
334 choice of tuning cohort. Second, the discovery GWAS sample may be reduced in size (and  
335 hence power) if a tuning cohort needs to be excluded from the discovery GWAS. In all our  
336 analyses the tuning cohort is excluded from all GWAS discovery samples so that GWAS  
337 discovery sample is not variable across methods for each target cohort. A sensitivity analyses  
338 that used the SCZ cohorts of msaf ( $N_{case}= 327$ ,  $N_{control}= 139$ ), gras ( $N_{case}= 1086$ ,  
339  $N_{control}= 1232$ ) or swe6 ( $N_{case}= 1094$ ,  $N_{control}= 1219$ ) as the tuning sample instead of  
340 cohort lie2 ( $N_{case}= 137$ ,  $N_{control}= 269$ ) show that the tuning cohort can have considerable  
341 impact (**Figure 3 and Figures S3-5**). In our results, the tuning cohort that generates higher  
342 PGS is method dependent and differs between cohorts. Although methods SBLUP, LDpred-  
343 Inf, LDpred-funct, PRS-CS-auto and SBayesR require no tuning cohort, they serve as a  
344 benchmark, since the differences in their results reflect differences in the changed discovery

345 samples (e.g., msaf is in the discovery sample, when lie2 is the tuning cohort, and *vice versa*),  
346 as well as the stochasticity inherent in the Gibbs sampling of Bayesian methods.

347

348 **The impact of MAF/INFO threshold.** A MAF threshold of 0.1 and a INFO threshold of 0.9  
349 are used to be consistent with applications in the PGC SCZ<sup>23</sup> and PGC MDD<sup>20</sup> studies, which  
350 had been imposed recognising that these thresholds generated more robust PGS results than  
351 using lower threshold values. In the second sensitivity analysis applied to the SCZ data, the  
352 MAF threshold was relaxed to 0.05 (**Figure 4**) and to 0.01 (**Figure S6**). The prediction  
353 evaluation statistics increase for some cohorts and decrease for others. SBLUP, PRS-CS,  
354 PRS-CS-auto and SBayesR are less affected than P+T, LDpred-Inf, LDpred-funct and  
355 LDpred. For QC threshold of  $MAF < 0.01$ , the differences in AUC have a similar trend  
356 compared to using  $MAF < 0.05$ , but with greater variability (**Figure S6**). The effects of MAF  
357 thresholds vary between cohorts, although the use of lower MAF threshold tends to generate  
358 higher AUC for the larger target samples. Across target cohorts, different evaluation statistics  
359 were almost identical when including less common SNPs (**Table S3**). Relaxing the INFO  
360 score to 0.3 has a negligible effect (**Figure S7**).

## 361 Discussion

362 Comparison of PGS risk prediction methods showed that all recent methods had higher  
363 prediction evaluation statistics over the benchmark P+T method for SCZ and MDD. While  
364 the differences between the recent methods were small, we found that SBayesR consistently  
365 ranked highest. Given that the PGS is a sum of many small effects, a normal distribution of  
366 PGS in a population is expected (and observed **Figures S8-S11**). In idealised data, such as  
367 the relatively simple simulation scenarios usually considered in method development, all  
368 evaluation statistics should rank the same, but with real data sets this is not guaranteed. This

369 is the motivation for considering a range of evaluation statistics. Our focus on statistics for  
370 those in the top 10% of PGS is partly motivated by potential clinical utility. In the context of  
371 psychiatry, it is likely that this will focus on people presenting in a prodromal state with  
372 clinical symptoms that have not yet crystallised to a specific diagnosis<sup>10; 43</sup>. High PGS in  
373 those presenting to clinics could help tilt the clinical decision-making towards closer  
374 monitoring or earlier intervention. Since a genetic-based predictor only predicts part of the  
375 risk of disease, and since a PGS only predicts part of the genetic contribution to disease it is  
376 acknowledged that PGS cannot be fully accurate predictors. Nonetheless, PGS, in  
377 combination with clinical risk factors, could make a useful contribution to risk prediction.

378

379 In sensitivity analyses that used different quality criteria for SNPs e.g. MAF of 0.01 vs 0.05,  
380 INFO of 0.3 vs 0.9, we concluded that, currently, there is little to be gained in PGS from  
381 including SNPs with  $MAF < 0.10$  and  $INFO < 0.9$  for the diseases/dataset studied (**Table S8**  
382 **and S9**). This result may seem counter-intuitive since variants with low MAF are expected to  
383 play an important role in common disease, and some may be expected to have larger effect  
384 sizes than more common variants<sup>44; 45</sup>. However, sampling variance is a function of allele  
385 frequency ( $\text{var}(y)/(2*MAF(1-MAF)*n)$ , where  $n$  is sample size), such that a variant of  $MAF$   
386  $=0.01$  has sampling variance 25 times greater than a variant of  $MAF=0.5$ . Moreover, in real  
387 data sets cohort sample size and technical artefacts can accumulate to increase error in effect  
388 size estimates particularly of low frequency variants. Our conclusion that little is gained from  
389 including variants of  $MAF < 0.1$  and reducing INFO threshold needs to be revisited as larger  
390 discovery samples and larger target cohorts accumulate.

391

392 For both SCZ and MDD, while all recent methods had similar performance, SBayesR saw the  
393 highest prediction accuracy in most of the comparisons. Although SCZ and MDD both have a



394 highly polygenic genetic architecture, we have recently shown that SBayesR outperforms  
395 other methods for two less polygenic diseases, Alzheimer's<sup>46</sup> (which includes the *APOE*  
396 locus which has a very large effect size) and ALS<sup>47</sup> (for which there is evidence of greater  
397 importance of low MAF variants compared to SCZ<sup>48</sup>). The original SBayesR publication  
398 showed that in both simulations and applications to real data, the method performed well  
399 across a range of traits with different underlying genetic architectures, which is because  
400 SBayesR can fit essentially any underlying architecture and other methods are special cases  
401 of the SBayesR model, except PRS-CS which uses different distributional approaches (**Table**  
402 **1**). We note that we did not consider a version of P+T that has been shown to have higher out  
403 of sample prediction compared to the standard implementation<sup>11</sup>. This method conducts a  
404 grid search in a tuning cohort to determine LD  $r^2$  and INFO score thresholds for SNPs as well  
405 as the p-value threshold. We chose to implement only the basic, commonly used P+T  
406 method, and specifically as implemented in published PGC studies. Moreover, many of the  
407 methods implemented here address optimum SNP selection from a methodological approach  
408 rather than grid search approach. We note that here we only considered the infinitesimal  
409 model version of LDpred-funct, because we have already found no advantage of LDpred over  
410 LDpred-inf in the preliminary analyses. For traits and diseases of other genetic architecture  
411 parameters of LDpred-funct should be investigated, although in the updated LDpred-funct  
412 preprint<sup>49</sup>, SBayesR was found to perform well across a range of quantitative and binary  
413 traits. We do note that SBayesR expects effect size estimates and their standard errors to have  
414 properties consistent with the sample size and with the LD patterns imposed from an external  
415 reference panel. If GWAS summary statistics have non-ideal properties (perhaps resulting  
416 from meta-analysis errors or approximations) then SBayesR may not achieve converged  
417 solutions. Last, we note that the comparison of methods uses only study samples of European  
418 ancestry. More research is needed to understand the properties of prediction methods within

419 other ancestries and across ancestries, given potential differences in genetic architectures (in  
420 terms of number, frequencies and effect sizes of causal variants) and LD between measured  
421 variants and causal variants<sup>50; 51</sup>. Such research is dependent on the availability of large  
422 GWAS data sets from non-European ancestries; currently there is considerable effort to  
423 increase GWAS sample collection across world-wide population groups to address this  
424 concern<sup>50-52</sup>.

425  
426 All recent methods are compared using their default parameters settings. An optimum setting  
427 of each method could potentially increase the prediction accuracy. For example, in sensitivity  
428 analyses we found that LDpred sees higher prediction accuracy when increasing the length of  
429 MCMC chain, while PRS-CS-auto and SBayesR results are not impacted by increasing the  
430 MCMC chain length beyond the default settings (**Table S10**). This result agrees with the  
431 recent revision of LDpred, LDpred2<sup>53</sup>. The underlying model and assumptions about the SNP  
432 effect distribution are unchanged, but higher prediction accuracy is reported for longer  
433 MCMC chain and larger LD windows. Most likely the optimum parameter settings are trait  
434 (genetic architecture) dependent<sup>11</sup>. Hence, we conclude that a key advantage of SBayesR is  
435 that there is no need for the user to tune or select model or software parameters. Moreover, it  
436 does not need a tuning cohort to derive SNP effect weights but learns the genetic architecture  
437 from the properties of the GWAS results. A third key advantage of SBayesR is computational  
438 speed. Using one CPU, it takes approximately 2 hours to generate SNP weights based on  
439 each discovery sample and predict into the left-out-cohort, compared to PRS-CS which needs  
440 40 hours using 5 CPUs (the CPU number is fixed in the PRS-CS software). Last, given that  
441 SBayesR uses only HapMap3 SNPs that are mostly well-imputed it should be possible to  
442 provide these SBayesR SNP weights as part of a GWAS pipeline to apply in external target  
443 samples.

## 444 Supplemental Data

445 The Supplemental Data include 11 figures and consortium members.

446

## 447 Acknowledgements

448 We acknowledge funding from the National health and Medical Research Council  
449 (1173790,1078901,108788 (NRW),1113400 (NRW, PMV)) and the Australian Research  
450 Council (FL180100072 (PMV)).

451 This work would not have been possible without the contributions of the investigators who  
452 comprise the PGC-SCZ and PGC-MDD working group. For a full list of acknowledgments of  
453 all individual cohorts included in PGC-SCZ and PGC-MDD, please see the original  
454 publications. The PGC has received major funding from the US National Institute of Mental  
455 Health and the US National Institute of Drug Abuse (U01 MH109528 and U01 MH1095320).  
456 We thank the customers, research participants and employees of 23andMe for making this  
457 work possible. The study protocol used by 23andMe was approved by an external AAHRPP-  
458 accredited institutional review board.

459 The Münster cohort was funded by the German Research Foundation (DFG, grant FOR2107  
460 DA1151/5-1 and DA1151/5-2 to U.D.; SFB-TRR58, Projects C09 and Z02 to U.D.) and the  
461 Interdisciplinary Center for Clinical Research (IZKF) of the medical faculty of Münster  
462 (grant Dan3/012/17 to U.D.).

463 Some data used in this study were obtained from dbGaP. dbGaP accession phs000021:  
464 funding support for the Genome-Wide Association of Schizophrenia Study was provided by  
465 the National Institute of Mental Health (R01 MH67257, R01 MH59588, R01 MH59571, R01  
466 MH59565, R01 MH59587, R01 MH60870, R01 MH59566, R01 MH59586, R01 MH61675,  
467 R01 MH60879, R01 MH81800, U01 MH46276, U01 MH46289, U01 MH46318, U01

468 MH79469, and U01 MH79470), and the genotyping of samples was provided through the  
469 Genetic Association Information Network (GAIN). Samples and associated phenotype data  
470 for the Genome-Wide Association of Schizophrenia Study were provided by the Molecular  
471 Genetics of Schizophrenia Collaboration (principal investigator P. V. Gejman, Evanston  
472 Northwestern Healthcare (ENH) and Northwestern University, Evanston, IL, USA). dbGaP  
473 accession phs000196: this work used in part data from the NINDS dbGaP database from the  
474 CIDR: NGRC PARKINSON'S DISEASE STUDY. dbGaP accession phs000187: High-  
475 Density SNP Association Analysis of Melanoma: Case–Control and Outcomes Investigation.  
476 Research support to collect data and develop an application to support this project was  
477 provided by P50 CA093459, P50 CA097007, R01 ES011740, and R01 CA133996 from the  
478 NIH.

479 Statistical analyses were carried out on the Genetic Cluster Computer  
480 (<http://www.geneticcluster.org>) hosted by SURFsara and financially supported by the  
481 Netherlands Scientific Organization (NWO 480-05-003) along with a supplement from the  
482 Dutch Brain Foundation and the VU University Amsterdam.

## 483 Declaration of Interests

484 The authors declare no competing interests.

## 485 References

- 486 1. The International Schizophrenia Consortium. (2009). Common polygenic variation  
487 contributes to risk of schizophrenia and bipolar disorder. *Nature* 460, 748-752.
- 488 2. Palk, A.C., Dalvie, S., De Vries, J., Martin, A.R., and Stein, D.J. (2019). Potential use of  
489 clinical polygenic risk scores in psychiatry—ethical implications and communicating  
490 high polygenic risk. *Philos. Ethics Humanit. Med.* 14, 4.
- 491 3. Wray, N.R., Goddard, M.E., and Visscher, P.M. (2007). Prediction of individual genetic risk  
492 to disease from genome-wide association studies. *Genome Res.* 17, 1520-1528.
- 493 4. Jenkins, M.A., Win, A.K., Dowty, J.G., MacInnis, R.J., Makalic, E., Schmidt, D.F., Dite, G.S.,  
494 Kapuscinski, M., Clendenning, M., and Rosty, C. (2019). Ability of known

- 495 susceptibility SNPs to predict colorectal cancer risk for persons with and without a  
496 family history. *Fam. Cancer* 18, 389-397.
- 497 5. Lee, A., Mavaddat, N., Wilcox, A.N., Cunningham, A.P., Carver, T., Hartley, S., de Villiers,  
498 C.B., Izquierdo, A., Simard, J., and Schmidt, M.K. (2019). BOADICEA: a comprehensive  
499 breast cancer risk prediction model incorporating genetic and non-genetic risk  
500 factors. *Genet. Med.* 21, 1708.
- 501 6. Khera, A.V., Chaffin, M., Aragam, K.G., Haas, M.E., Roselli, C., Choi, S.H., Natarajan, P.,  
502 Lander, E.S., Lubitz, S.A., and Ellinor, P.T. (2018). Genome-wide polygenic scores for  
503 common diseases identify individuals with risk equivalent to monogenic mutations.  
504 *Nat. Genet.* 50, 1219-1224.
- 505 7. Lloyd-Jones, D.M., Wilson, P.W.F., Larson, M.G., Beiser, A., Leip, E.P., D'Agostino, R.B., and  
506 Levy, D. (2004). Framingham risk score and prediction of lifetime risk for coronary  
507 heart disease. *Am. J. Cardiol.* 94, 20-24.
- 508 8. McCarthy, M.I., and Mahajan, A. (2018). The value of genetic risk scores in precision  
509 medicine for diabetes. *Expert Rev. Precis. Med. Drug Dev.* 3.
- 510 9. Torkamani, A., Wineinger, N.E., and Topol, E.J. (2018). The personal and clinical utility of  
511 polygenic risk scores. *Nat. Rev. Genet.* 19, 581.
- 512 10. Murray, G.K., Lin, T., Austin, J., McGrath, J.J., Hickie, Ian B., and Wray, N.R. (2020).  
513 Polygenic risk scores - could they be useful in psychiatry? Submitted.
- 514 11. Privé, F., Vilhjálmsson, B.J., Aschard, H., and Blum, M.G.B. (2019). Making the most of  
515 Clumping and Thresholding for polygenic scores. *Am. J. Hum. Genet.* 105, 1213-1221.
- 516 12. Robinson, M.R., Kleinman, A., Graff, M., Vinkhuyzen, A.A.E., Couper, D., Miller, M.B.,  
517 Peyrot, W.J., Abdellaoui, A., Zietsch, B.P., and Nolte, I.M. (2017). Genetic evidence of  
518 assortative mating in humans. *Nat. Hum. Behav.* 1, 0016.
- 519 13. Vilhjálmsson, B.J., Yang, J., Finucane, H.K., Gusev, A., Lindström, S., Ripke, S., Genovese,  
520 G., Loh, P.-R., Bhatia, G., and Do, R. (2015). Modeling linkage disequilibrium  
521 increases accuracy of polygenic risk scores. *Am. J. Hum. Genet.* 97, 576-592.
- 522 14. Marquez-Luna, C., Gazal, S., Loh, P.-R., Furlotte, N., Auton, A., Price, A.L., and andMe  
523 Research, T. (2018). Modeling functional enrichment improves polygenic prediction  
524 accuracy in UK Biobank and 23andMe data sets. *bioRxiv*, 375337.
- 525 15. Ge, T., Chen, C.-Y., Ni, Y., Feng, Y.-C.A., and Smoller, J.W. (2019). Polygenic prediction via  
526 Bayesian regression and continuous shrinkage priors. *Nat. Commun.* 10, 1776.
- 527 16. Lloyd-Jones, L.R., Zeng, J., Sidorenko, J., Yengo, L., Moser, G., Kemper, K.E., Wang, H.,  
528 Zheng, Z., Magi, R., and Esko, T. (2019). Improved polygenic prediction by Bayesian  
529 multiple regression on summary statistics. *bioRxiv*.
- 530 17. Chatterjee, N., Shi, J., and García-Closas, M. (2016). Developing and evaluating polygenic  
531 risk prediction models for stratified disease prevention. *Nat. Rev. Genet.* 17, 392.
- 532 18. The International Schizophrenia Consortium. (2020). Manuscript in preparation.
- 533 19. Pardiñas, A.F., Holmans, P., Pocklington, A.J., Escott-Price, V., Ripke, S., Carrera, N.,  
534 Legge, S.E., Bishop, S., Cameron, D., and Hamshere, M.L. (2018). Common  
535 schizophrenia alleles are enriched in mutation-intolerant genes and in regions under  
536 strong background selection. *Nat. Genet.* 50, 381-389.
- 537 20. Wray, N.R., Ripke, S., Mattheisen, M., Trzaskowski, M., Byrne, E.M., Abdellaoui, A.,  
538 Adams, M.J., Agerbo, E., Air, T.M., and Andlauer, T.M.F. (2018). Genome-wide  
539 association analyses identify 44 risk variants and refine the genetic architecture of  
540 major depression. *Nat. Genet.* 50, 668.

- 541 21. Howard, D.M., Adams, M.J., Clarke, T.-K., Hafferty, J.D., Gibson, J., Shiralí, M., Coleman,  
542 J.R.I., Hagenaars, S.P., Ward, J., and Wigmore, E.M. (2019). Genome-wide meta-  
543 analysis of depression identifies 102 independent variants and highlights the  
544 importance of the prefrontal brain regions. *Nat. Neurosci.* 22, 343.
- 545 22. Trzaskowski, M., Mehta, D., Peyrot, W.J., Hawkes, D., Davies, D., Howard, D.M., Kemper,  
546 K.E., Sidorenko, J., Maier, R., and Ripke, S. (2019). Quantifying between-cohort and  
547 between-sex genetic heterogeneity in major depressive disorder. *American Journal*  
548 *of Medical Genetics Part B: Neuropsychiatric Genetics* 180, 439-447.
- 549 23. Schizophrenia Working Group of the Psychiatric Genomics Consortium. (2014). Biological  
550 insights from 108 schizophrenia-associated genetic loci. *Nature* 511, 421-427.
- 551 24. Howard, D.M., Adams, M.J., Shiralí, M., Clarke, T.-K., Marioni, R.E., Davies, G., Coleman,  
552 J.R.I., Alloza, C., Shen, X., and Barbu, M.C. (2018). Genome-wide association study of  
553 depression phenotypes in UK Biobank identifies variants in excitatory synaptic  
554 pathways. *Nat. Commun.* 9, 1-10.
- 555 25. Hyde, C.L., Nagle, M.W., Tian, C., Chen, X., Paciga, S.A., Wendland, J.R., Tung, J.Y., Hinds,  
556 D.A., Perlis, R.H., and Winslow, A.R. (2016). Identification of 15 genetic loci  
557 associated with risk of major depression in individuals of European descent. *Nat.*  
558 *Genet.* 48, 1031.
- 559 26. Banda, Y., Kvale, M.N., Hoffmann, T.J., Hesselton, S.E., Ranatunga, D., Tang, H., Sabatti,  
560 C., Croen, L.A., Dispensa, B.P., and Henderson, M. (2015). Characterizing  
561 race/ethnicity and genetic ancestry for 100,000 subjects in the Genetic Epidemiology  
562 Research on Adult Health and Aging (GERA) cohort. *Genetics* 200, 1285-1295.
- 563 27. Pedersen, C.B., Bybjerg-Grauholm, J., Pedersen, M.G., Grove, J., Agerbo, E., Baekvad-  
564 Hansen, M., Poulsen, J.B., Hansen, C.S., McGrath, J.J., and Als, T.D. (2018). The  
565 iPSYCH2012 case-cohort sample: new directions for unravelling genetic and  
566 environmental architectures of severe mental disorders. *Mol. Psychiatry* 23, 6-14.
- 567 28. Ripke, S., Wray, N.R., Lewis, C.M., Hamilton, S.P., Weissman, M.M., Breen, G., Byrne,  
568 E.M., Blackwood, D.H.R., Boomsma, D.I., and Cichon, S. (2013). A mega-analysis of  
569 genome-wide association studies for major depressive disorder. *Mol. Psychiatry* 18,  
570 497-511.
- 571 29. Smith, B.H., Campbell, A., Linksted, P., Fitzpatrick, B., Jackson, C., Kerr, S.M., Deary, I.J.,  
572 MacIntyre, D.J., Campbell, H., and McGilchrist, M. (2012). Cohort Profile: Generation  
573 Scotland: Scottish Family Health Study (GS: SFHS). The study, its participants and  
574 their potential for genetic research on health and illness. *Int. J. Epidemiol.* 42, 689-  
575 700.
- 576 30. Fernandez-Pujals, A.M., Adams, M.J., Thomson, P., McKechnie, A.G., Blackwood, D.H.R.,  
577 Smith, B.H., Dominiczak, A.F., Morris, A.D., Matthews, K., and Campbell, A. (2015).  
578 Epidemiology and heritability of major depressive disorder, stratified by age of  
579 onset, sex, and illness course in Generation Scotland: Scottish Family Health Study  
580 (GS: SFHS). *PLoS One* 10, e0142197.
- 581 31. Lam, M., Awasthi, S., Watson, H.J., Goldstein, J., Panagiotaropoulou, G., Trubetskoy, V.,  
582 Karlsson, R., Frej, O., Fan, C.-C., De Witte, W., et al. (2019). RICOPILI: Rapid  
583 Imputation for COnsortias PIpeLine. *Bioinformatics*.
- 584 32. Chang, C.C., Chow, C.C., Tellier, L.C.A.M., Vattikuti, S., Purcell, S.M., and Lee, J.J. (2015).  
585 Second-generation PLINK : rising to the challenge of larger and richer datasets.  
586 *GigaScience*. 4.

- 587 33. Euesden, J., Lewis, C.M., and O'Reilly, P.F. (2015). PRSice: polygenic risk score software.  
588 *Bioinformatics* 31, 1466-1468.
- 589 34. Yang, J., Lee, S.H., Goddard, M.E., and Visscher, P.M. (2011). GCTA: A tool for genome-  
590 wide complex trait analysis. *Am. J. Hum. Genet.* 88, 76-82.
- 591 35. Gazal, S., Finucane, H.K., Furlotte, N.A., Loh, P.-R., Palamara, P.F., Liu, X., Schoech, A.,  
592 Bulik-Sullivan, B., Neale, B.M., and Gusev, A. (2017). Linkage disequilibrium-  
593 dependent architecture of human complex traits shows action of negative selection.  
594 *Nat. Genet.* 49, 1421.
- 595 36. Finucane, H.K., Bulik-sullivan, B., Gusev, A., Trynka, G., Reshef, Y., Loh, P.-r., Anttila, V.,  
596 Xu, H., Zang, C., Farh, K., et al. (2015). Partitioning heritability by functional  
597 annotation using genome-wide association summary statistics. *Nat. Genet.* 47, 1228-  
598 1235.
- 599 37. Lee, S.H., Goddard, M.E., Wray, N.R., and Visscher, P.M. (2012). A better coefficient of  
600 determination for genetic profile analysis. *Genet. Epidemiol.* 36, 214-224.
- 601 38. Lee, S.H., Wray, N.R., Goddard, M.E., and Visscher, P.M. (2011). Estimating missing  
602 heritability for disease from genome-wide association studies. *Am. J. Hum. Genet.*  
603 88, 294-305.
- 604 39. Wray, N.R., Lin, T., Austin, J., McGrath, J.J., Hickie, Ian B., Murray, G.K., and Visscher,  
605 P.M. (2020). Polygenic risk scores – from basic science to clinical application: a  
606 primer. *JAMA Psychiatry* (In press).
- 607 40. Zheutlin, A.B., Dennis, J., Karlsson Linnér, R., Moscati, A., Restrepo, N., Straub, P.,  
608 Ruderfer, D., Castro, V.M., Chen, C.-Y., and Ge, T. (2019). Penetrance and pleiotropy  
609 of polygenic risk scores for schizophrenia in 106,160 patients across four health care  
610 systems. *Am. J. Psychiatry* 176, 846-855.
- 611 41. Binder, E.B. (2019). Polygenic Risk Scores in Schizophrenia: Ready for the Real World?  
612 *Am. J. Psychiatry* 170, 783-784.
- 613 42. Rehbach, K., Zhang, H., Das, D., Abdollahi, S.S., Prorok, T., Ghosh, S., Weintraub, S.,  
614 Genovese, G., Powell, S., and Lund, A. (2020). Publicly available hiPSC lines with  
615 extreme polygenic risk scores for modeling schizophrenia. *bioRxiv*.
- 616 43. Perkins, D.O., Olde Loohuis, L., Barbee, J., Ford, J., Jeffries, C.D., Addington, J., Bearden,  
617 C.E., Cadenhead, K.S., Cannon, T.D., and Cornblatt, B.A. (2020). Polygenic risk score  
618 contribution to psychosis prediction in a target population of persons at clinical high  
619 risk. *Am. J. Psychiatry* 177, 155-163.
- 620 44. Park, J.-H., Gail, M.H., Weinberg, C.R., Carroll, R.J., Chung, C.C., Wang, Z., Chanock, S.J.,  
621 Fraumeni, J.F., and Chatterjee, N. (2011). Distribution of allele frequencies and effect  
622 sizes and their interrelationships for common genetic susceptibility variants.  
623 *Proceedings of the National Academy of Sciences* 108, 18026-18031.
- 624 45. Bombá, L., Walter, K., and Soranzo, N. (2017). The impact of rare and low-frequency  
625 genetic variants in common disease. *Genome Biol.* 18, 77.
- 626 46. Zhang, Q., Visscher, P.M., and McRae, A.F. (2020). Risk prediction of late-onset  
627 Alzheimer's disease implies an oligogenic architecture. Submitted.
- 628 47. Restuadi, R., Garton, F.C., Benyamin, B., and Lin, T. (2020). Polygenic Risk Score Analysis  
629 for Amyotrophic Lateral Sclerosis leveraging Cognitive Performance, Educational  
630 Attainment and Schizophrenia. *Eur. J of Hum. Genet.*
- 631 48. van Rheenen, W., Shatunov, A., Dekker, A.M., McLaughlin, R.L., Diekstra, F.P., Pulit, S.L.,  
632 van der Spek, R.A., Vösa, U., de Jong, S., and Robinson, M.R. (2016). PARALS Registry.  
633 SLALOM Group. SLAP Registry. FALS Sequencing Consortium. SLAGEN Consortium.

- 634 NNIPPS Study Group Genome-wide association analyses identify new risk variants  
635 and the genetic architecture of amyotrophic lateral sclerosis. *Nat. Genet.* 48, 1043-  
636 1048.
- 637 49. Márquez-Luna, C., Gazal, S., Loh, P.-R., Kim, S.S., and Furlotte, N. LDpred-funct:  
638 incorporating functional priors improves polygenic prediction accuracy in UK Biobank  
639 and 23andMe data sets.
- 640 50. Martin, A.R., Kanai, M., Kamatani, Y., Okada, Y., Neale, B.M., and Daly, M.J. (2019).  
641 Clinical use of current polygenic risk scores may exacerbate health disparities. *Nat.*  
642 *Genet.* 51, 584.
- 643 51. Peterson, R.E., Kuchenbaecker, K., Walters, R.K., Chen, C.Y., Popejoy, A.B., Periyasamy,  
644 S., Lam, M., Iyegbe, C., Strawbridge, R.J., Brick, L., et al. (2019). Genome-wide  
645 Association Studies in Ancestrally Diverse Populations: Opportunities, Methods,  
646 Pitfalls, and Recommendations. *Cell* 179, 589-603.
- 647 52. Karczewski, K.J., and Martin, A.R. (2020). Analytic and Translational Genetics. *Annu. Rev.*  
648 *Biomed. Data Sci.* 3.
- 649 53. Privé, F., Arbel, J., and Vilhjálmsson, B.J. (2020). LDpred2: better, faster, stronger.  
650 *BioRxiv.*  
651



652 **Figure**

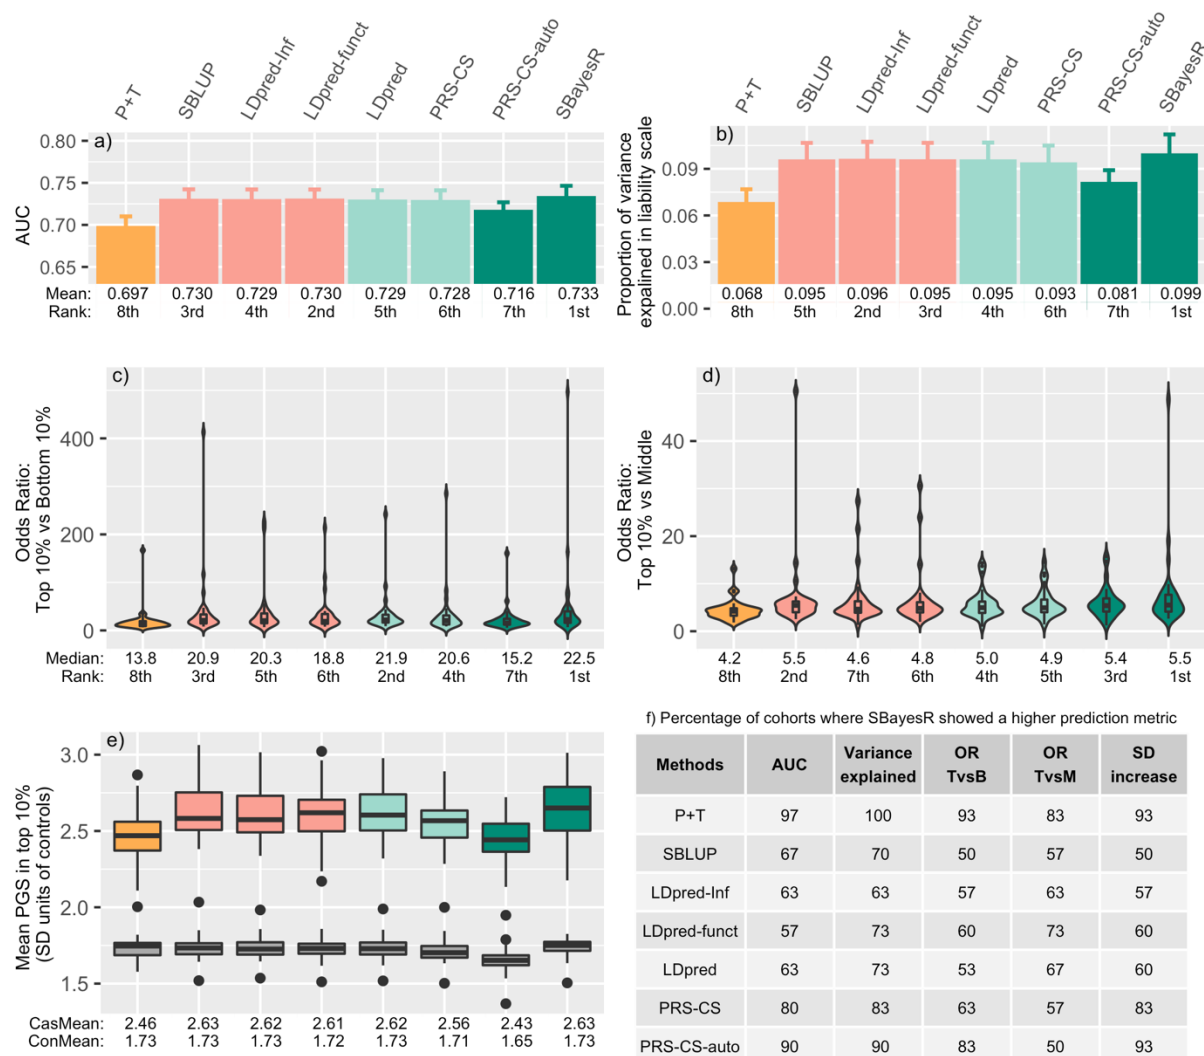

653 **Figure 1. Results from prediction of SCZ case/control status using different PGS**

654 **methods.**

656 a) The area under curve (AUC) statistic. The AUC is a measure for the prediction accuracy,  
 657 which indicates the probability that a case ranks higher than a control. The predictors  
 658 were constructed from GWAS summary statistics of PGC-SCZ2+ excluding the target  
 659 cohort and the tuning cohort (cohort ‘lie2’). Each bar reflects the mean AUC across 30  
 660 target cohorts, the whiskers show the 95% confidence interval for comparing means. The  
 661 number below each bar is the mean AUC estimated by each method, followed by its rank.  
 662 P+T is the benchmark method which is shown in orange. Pink shows the methods that use

663 an infinitesimal model assumption. Light green shows the methods using a tuning cohort  
664 to determine the genetic architecture of a trait. Dark green shows the methods learning the  
665 genetic architecture from discovery sample, without using a tuning cohort.

666 b) The proportion of variance explained by PGS on the scale of liability, assuming a  
667 population lifetime risk of 1%.

668 c) The odds ratio when considering the odds of being a case comparing the top 10% vs  
669 bottom 10% of PGS. The number below each violin is the median OR estimated by each  
670 method, followed by its rank.

671 d) The odds ratio when considering the odds of being a case comparing the top 10% vs those  
672 in the middle of the PGS distribution, calculated as the averaged odds ratio of the top  
673 10% ranked on PGS relative to the 5<sup>th</sup> decile and 6<sup>th</sup> decile. The number below each  
674 violin is the median OR estimated by each method, followed by its rank.

675 e) The mean of the PGS for the top 10% cases (coloured boxes) and for the top 10% of  
676 controls (grey boxes) in PGS standard deviation (SD) unit scale so that controls have  
677 mean PGS of zero and SD of 1.

678 f) This table shows the percentages of the number of cohorts (out of 30) where SBayesR  
679 showed a higher prediction metric compared to different methods. AUC: Area under  
680 curve; Variance explained: The proportion of variance explained by PGS in liability  
681 scale; OR TvsB: odds ratio, comparing the top 10% vs bottom 10% of PGS; OR TvsM:  
682 odds ratio, comparing the top 10% vs those in the middle of the PGS distribution; SD  
683 increase: standard deviation units increasing of the PGS for the top 10% cases.

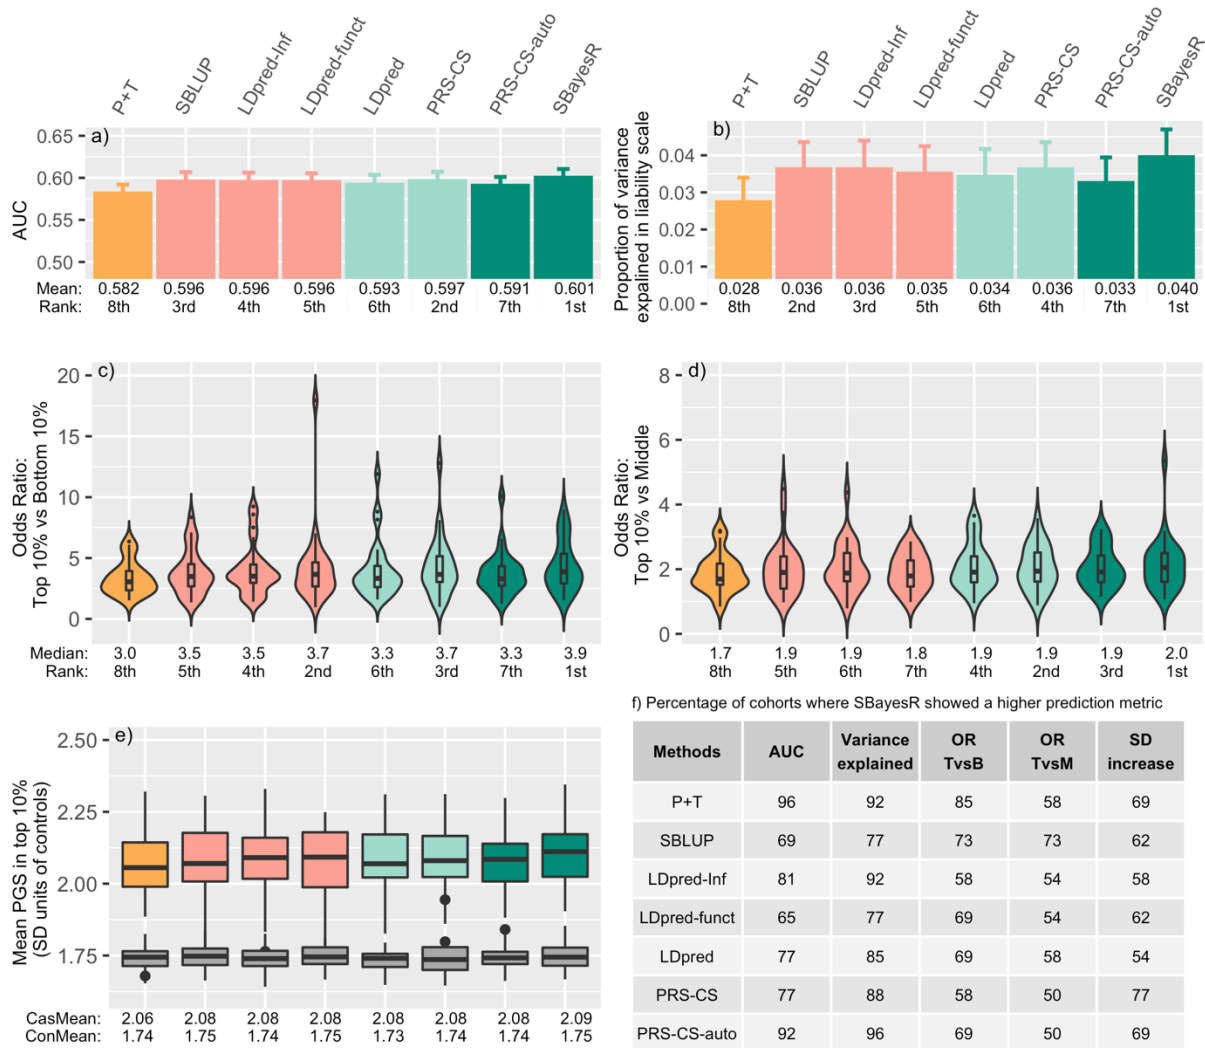

684

685 **Figure 2. Results from prediction of MDD case/control status using different PGS**

686 **methods.**

687 Similar to the caption of Figure 1, but the predictors were constructed from GWAS summary  
 688 statistics of UK Biobank<sup>15</sup>, 23andMe<sup>16</sup>, GERA<sup>17</sup>, iPSYCH<sup>18</sup>, deCODE<sup>19</sup>, GenScotland<sup>20,21</sup>,  
 689 PGC-MDD29 excluding the target cohort. The target cohorts comprised 26 of the 29 cohorts  
 690 in MDD29. A cohort from Muenster, not included in the MDD29 was used as the tuning  
 691 sample. The assumed population lifetime risk was 15% when estimating the proportion of  
 692 variance explained by MDD PGS in liability scale.

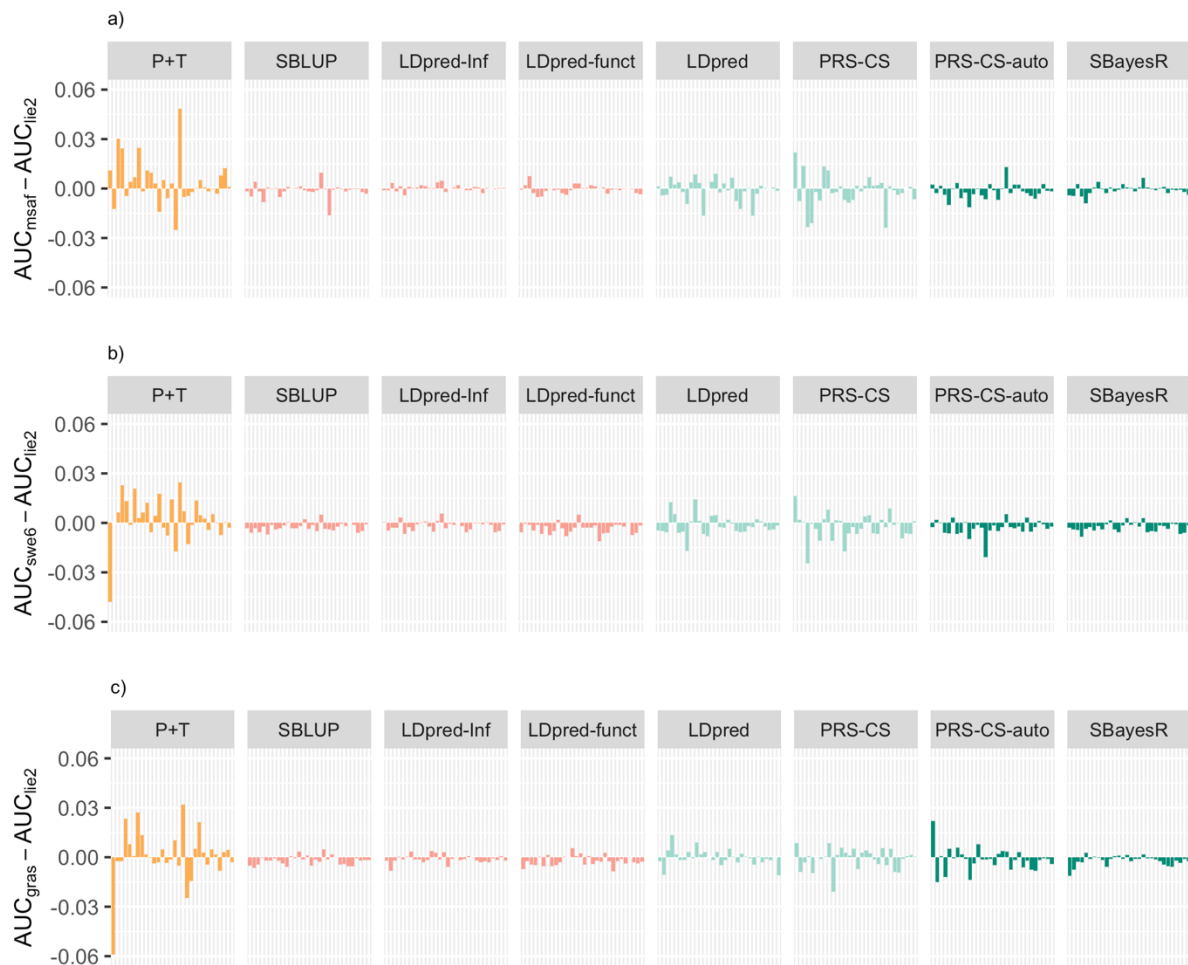

693  
694

**Figure 3. Sensitivity analyses using different tuning cohorts.**

695 Differences in AUC of a PGS method when using different tuning cohorts. The different bars  
696 in each method (x-axis) refer to different validation cohorts ordered by sample size. The y-  
697 axis is the AUC difference when using alternative tuning cohort (i.e. msaf, sew6 or gras),  
698 compared to 'lie2'. The MAF QC threshold is 0.1. Note: SBLUP, LDpred-Inf and LDpred-  
699 funct, PRS-CS-auto and SBayesR do not need a tuning cohort, but serve as a benchmark to  
700 methods which need a tuning cohort. These methods differ when a different tuning cohort is  
701 left out, because the discovery GWAS also changes.

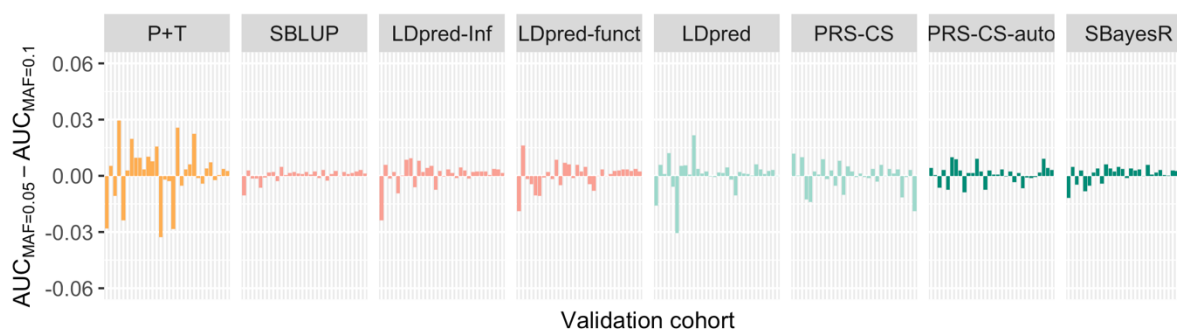

702

703 **Figure 4. Sensitivity analyses using different MAF quality control thresholds.**

704 Differences in AUC of a PGS method when using different MAF QC thresholds. The

705 different bars in each method (x-axis) refer to different validation cohorts ordered by sample

706 size. The y-axis is the AUC difference between analyses using MAF < 0.05 and MAF < 0.1 as

707 a QC threshold. The tuning cohort is 'lie2'.

708

709 **Table**

710

711 Table 1. Summary of methods used to generate PGS

| Method              | Distribution of SNP effects                                                                                                                                                                                            | Tuning sample | Pre-defined parameters                                                                                           | Parameters estimated in tuning sample |
|---------------------|------------------------------------------------------------------------------------------------------------------------------------------------------------------------------------------------------------------------|---------------|------------------------------------------------------------------------------------------------------------------|---------------------------------------|
| <b>P+T</b>          | None                                                                                                                                                                                                                   | Yes           | -                                                                                                                | P value threshold                     |
| <b>SBLUP</b>        | $\beta \sim N(0, \frac{h_g^2}{m})$<br>$h_g^2$ : SNP-heritability, $m$ : number of SNPs                                                                                                                                 | No            | $M$ ,<br>$h_g^2$ ,<br>LD radius in kb                                                                            | -                                     |
| <b>LDpred-Inf</b>   | Same as SBLUP                                                                                                                                                                                                          | No            | Sample size,<br>LD radius in number of SNPs                                                                      | -                                     |
| <b>LDpred-funct</b> | $\beta_j \sim N(0, c\sigma_j^2)$<br>$\sum_{j=1}^M 1_{\sigma_j^2 > 0} c\sigma_j^2 = h_g^2$ , $c$ is a normalizing constant<br>$\sigma_j^2$ is the expected per SNP-heritability under the baseline-LD annotation model. | No            | $h_g^2$ ,<br>Per-SNP heritability estimated from stratified LDSC,<br>Sample size,<br>LD radius in number of SNPs | -                                     |
| <b>LDpred</b>       | $\beta_j \sim \begin{cases} N(0, \frac{h_g^2}{\pi m}), & \text{with probability of } \pi \\ 0, & \text{with probability of } 1 - \pi \end{cases}$                                                                      | Yes           | Sample size,<br>LD radius in number of SNPs                                                                      | $\pi$                                 |
| <b>PRS-CS</b>       | $\beta_j \sim N(0, \frac{\sigma^2}{n} \psi_j)$<br>$\psi_j \sim G(a, \delta_j)$<br>$\delta_j \sim G(b, \phi)$<br>$\phi$ is a global scaling parameter.<br>$n$ is sample size<br>$G$ is a Gamma distribution             | Yes           | $a, b$ ,<br>Sample size                                                                                          | $\phi$                                |
| <b>PRS-CS-auto</b>  | Same as PRS-CS, but estimates $\phi$ from the discovery GWAS.                                                                                                                                                          | No            | $a, b$ ,<br>Sample size                                                                                          | -                                     |

|                |                                                                                                                                                                                                                                                                                  |    |            |
|----------------|----------------------------------------------------------------------------------------------------------------------------------------------------------------------------------------------------------------------------------------------------------------------------------|----|------------|
|                |                                                                                                                                                                                                                                                                                  |    |            |
| <b>SBayesR</b> | $\beta_j   \pi, \sigma_\beta^2 \sim \begin{cases} 0, & \text{with probability of } \pi_1 \\ N(0, \gamma_2 \sigma_\beta^2), & \text{with probability of } \pi_2 \\ \vdots \\ N(0, \gamma_c \sigma_\beta^2), & \text{with probability of } 1 - \sum_{c=1}^{c-1} \pi_c \end{cases}$ | No | -          |
|                | $\sigma_\beta^2 \sim \text{Inv} - \chi^2(4)$                                                                                                                                                                                                                                     |    | $\gamma_i$ |
|                | $\pi_i \sim \text{Dir}(\mathbf{1})$                                                                                                                                                                                                                                              |    |            |
|                | $\gamma_i$ are scaling parameters                                                                                                                                                                                                                                                |    |            |

---

712 Distributions: *N*: normal, *G*: gamma, *Inv* -  $\chi^2$ : inverse chi-squared distribution, *Dir*: Dirichlet

713
